# Supplementary material
Source: PubMed Central journal article supplement (PMC7017952)

**Figure S1. Participant Flow**

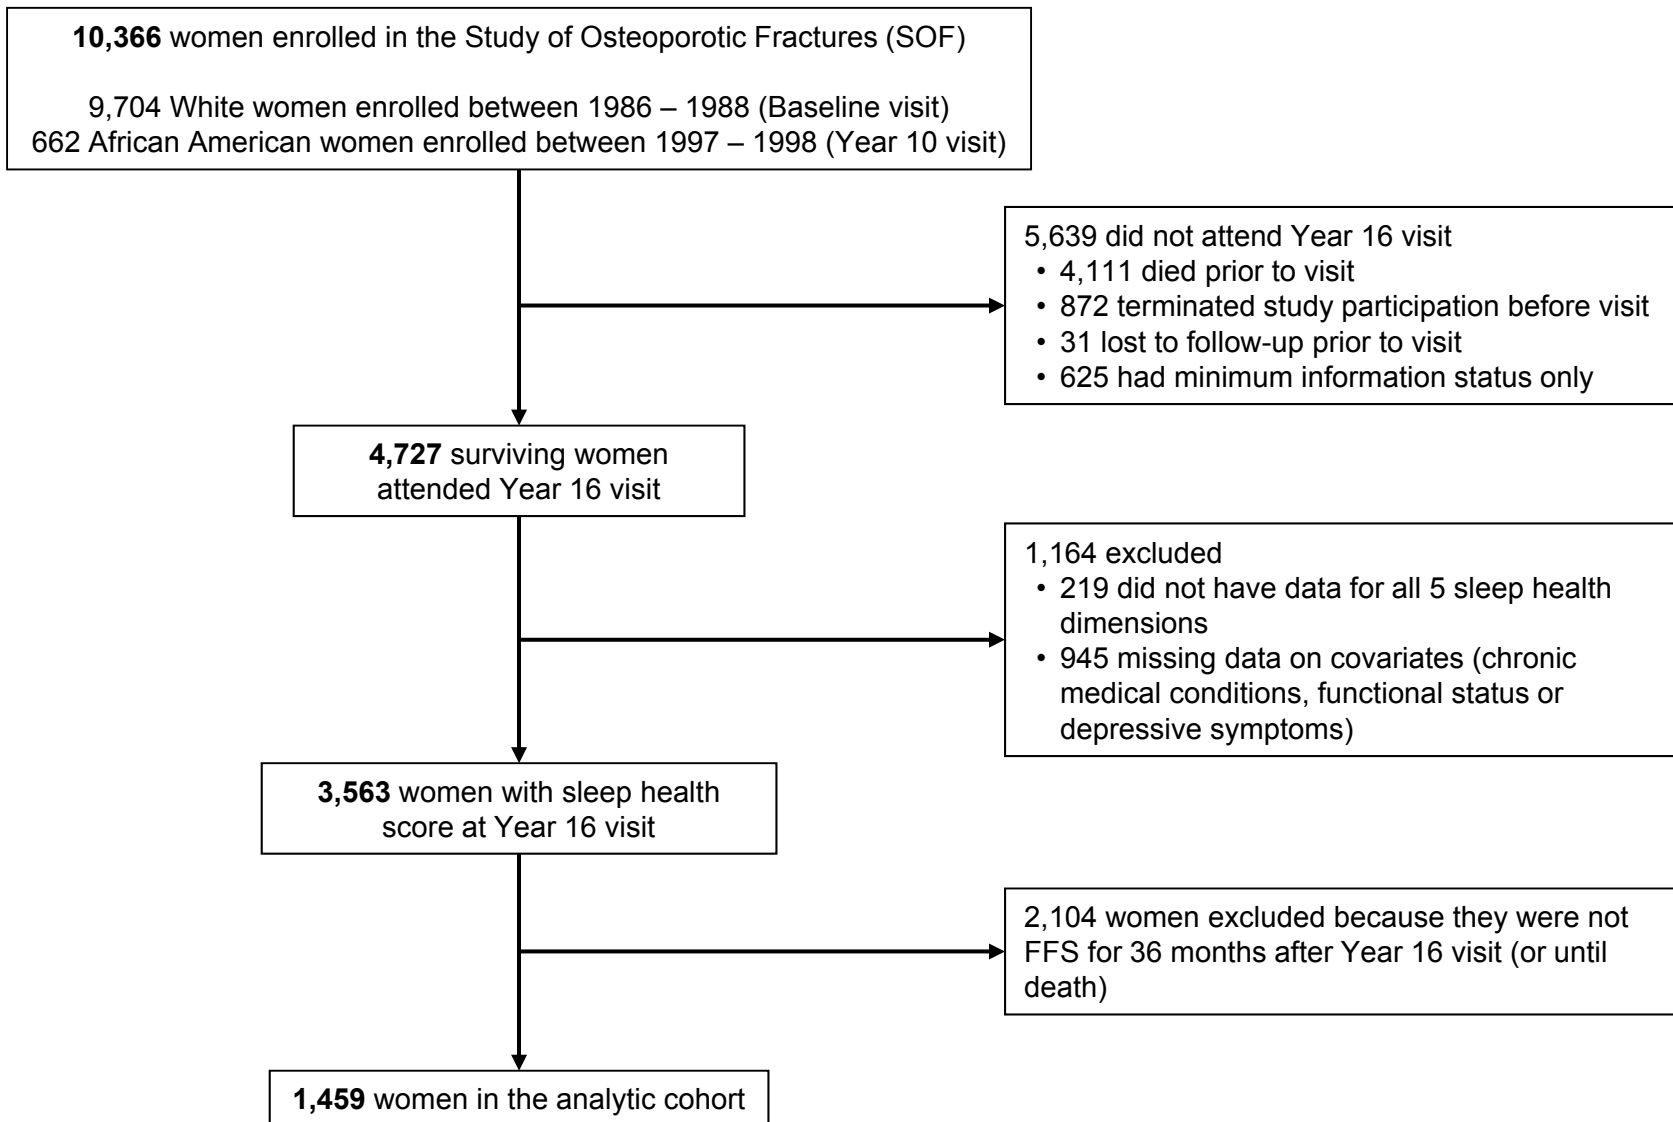

Abbreviations: FFS, Fee-For-Service

Supplement: zsz230_suppl_supplement_fig_s1.pdf [file zsz230_suppl_supplement_fig_s1.pdf]
